# Supplementary material
Source: MDPI journal article supplement (https://www.mdpi.com/search?q=jfb-16-00133)
Supplement: s001 [file jfb-16-00133-s001.zip]

## Supplementary S1: ANOVA Fischer test new bone regeneration ratio comparison

| Type de greffe / Fisher (LSD) / Analyse des différences entre les modalités avec un intervalle de confiance à 95% (Moyenne) : |            |                         |                 |              |              |  |  |
|-------------------------------------------------------------------------------------------------------------------------------|------------|-------------------------|-----------------|--------------|--------------|--|--|
| Contraste                                                                                                                     | Différence | Différence standardisée | Valeur critique | Pr > Diff    | Significatif |  |  |
| Bioglass vs BCP + PRF                                                                                                         | 23,400     | 2,287                   | 2,023           | <b>0,028</b> | Oui          |  |  |
| Bioglass vs BC                                                                                                                | 20,600     | 2,013                   | 2,023           | 0,051        | Non          |  |  |
| Bioglass vs EB                                                                                                                | 19,650     | 1,920                   | 2,023           | 0,062        | Non          |  |  |
| Bioglass vs AIB                                                                                                               | 19,100     | 1,867                   | 2,023           | 0,069        | Non          |  |  |
| Bioglass vs AIB + ABB                                                                                                         | 17,600     | 1,720                   | 2,023           | 0,093        | Non          |  |  |
| Bioglass vs ABB                                                                                                               | 15,500     | 1,515                   | 2,023           | 0,138        | Non          |  |  |
| Bioglass vs ABB + PRF                                                                                                         | 14,600     | 1,427                   | 2,023           | 0,162        | Non          |  |  |
| Bioglass vs BCP                                                                                                               | 13,700     | 1,339                   | 2,023           | 0,188        | Non          |  |  |
| Bioglass vs ABB + BMC                                                                                                         | 11,700     | 1,143                   | 2,023           | 0,260        | Non          |  |  |
| Bioglass vs HA + PRF                                                                                                          | 11,700     | 1,143                   | 2,023           | 0,260        | Non          |  |  |
| Bioglass vs $\beta$ -TCP + AB                                                                                                 | 10,733     | 1,049                   | 2,023           | 0,301        | Non          |  |  |
| Bioglass vs HA                                                                                                                | 10,533     | 1,029                   | 2,023           | 0,310        | Non          |  |  |
| Bioglass vs ABB + AB                                                                                                          | 5,400      | 0,528                   | 2,023           | 0,601        | Non          |  |  |
| Bioglass vs $\beta$ -TCP                                                                                                      | 3,833      | 0,375                   | 2,023           | 0,710        | Non          |  |  |
| Bioglass vs Bioglass + /                                                                                                      | 2,500      | 0,244                   | 2,023           | 0,808        | Non          |  |  |
| Bioglass vs AB                                                                                                                | 1,580      | 0,154                   | 2,023           | 0,878        | Non          |  |  |
| Bioglass vs AIB + AB                                                                                                          | 1,000      | 0,098                   | 2,023           | 0,923        | Non          |  |  |
| AIB + AB vs BCP + PRF                                                                                                         | 22,400     | 2,189                   | 2,023           | <b>0,035</b> | Oui          |  |  |
| AIB + AB vs BC                                                                                                                | 19,600     | 1,915                   | 2,023           | 0,063        | Non          |  |  |
| AIB + AB vs EB                                                                                                                | 18,650     | 1,823                   | 2,023           | 0,076        | Non          |  |  |
| AIB + AB vs AIB                                                                                                               | 18,100     | 1,769                   | 2,023           | 0,085        | Non          |  |  |
| AIB + AB vs AIB + ABB                                                                                                         | 16,600     | 1,622                   | 2,023           | 0,113        | Non          |  |  |
| AIB + AB vs ABB                                                                                                               | 14,500     | 1,417                   | 2,023           | 0,164        | Non          |  |  |
| AIB + AB vs ABB + PRF                                                                                                         | 13,600     | 1,329                   | 2,023           | 0,192        | Non          |  |  |
| AIB + AB vs BCP                                                                                                               | 12,700     | 1,241                   | 2,023           | 0,222        | Non          |  |  |
| AIB + AB vs ABB + BMC                                                                                                         | 10,700     | 1,046                   | 2,023           | 0,302        | Non          |  |  |
| AIB + AB vs HA + PRF                                                                                                          | 10,700     | 1,046                   | 2,023           | 0,302        | Non          |  |  |
| AIB + AB vs $\beta$ -TCP + AB                                                                                                 | 9,733      | 0,951                   | 2,023           | 0,347        | Non          |  |  |
| AIB + AB vs HA                                                                                                                | 9,533      | 0,932                   | 2,023           | 0,357        | Non          |  |  |
| AIB + AB vs ABB + AB                                                                                                          | 4,400      | 0,430                   | 2,023           | 0,670        | Non          |  |  |
| AIB + AB vs $\beta$ -TCP                                                                                                      | 2,833      | 0,277                   | 2,023           | 0,783        | Non          |  |  |
| AIB + AB vs Bioglass + /                                                                                                      | 1,500      | 0,147                   | 2,023           | 0,884        | Non          |  |  |
| AIB + AB vs AB                                                                                                                | 0,580      | 0,057                   | 2,023           | 0,955        | Non          |  |  |
| AB vs BCP + PRF                                                                                                               | 21,820     | 2,132                   | 2,023           | <b>0,039</b> | Oui          |  |  |
| AB vs BC                                                                                                                      | 19,020     | 1,859                   | 2,023           | 0,071        | Non          |  |  |
| AB vs EB                                                                                                                      | 18,070     | 1,766                   | 2,023           | 0,085        | Non          |  |  |
| AB vs AIB                                                                                                                     | 17,520     | 1,712                   | 2,023           | 0,095        | Non          |  |  |
| AB vs AIB + ABB                                                                                                               | 16,020     | 1,566                   | 2,023           | 0,126        | Non          |  |  |
| AB vs ABB                                                                                                                     | 13,920     | 1,360                   | 2,023           | 0,182        | Non          |  |  |
| AB vs ABB + PRF                                                                                                               | 13,020     | 1,272                   | 2,023           | 0,211        | Non          |  |  |
| AB vs BCP                                                                                                                     | 12,120     | 1,184                   | 2,023           | 0,243        | Non          |  |  |
| AB vs ABB + BMC                                                                                                               | 10,120     | 0,989                   | 2,023           | 0,329        | Non          |  |  |
| AB vs HA + PRF                                                                                                                | 10,120     | 0,989                   | 2,023           | 0,329        | Non          |  |  |
| AB vs $\beta$ -TCP + AB                                                                                                       | 9,153      | 0,895                   | 2,023           | 0,377        | Non          |  |  |
| AB vs HA                                                                                                                      | 8,953      | 0,875                   | 2,023           | 0,387        | Non          |  |  |
| AB vs ABB + AB                                                                                                                | 3,820      | 0,373                   | 2,023           | 0,711        | Non          |  |  |
| AB vs $\beta$ -TCP                                                                                                            | 2,253      | 0,220                   | 2,023           | 0,827        | Non          |  |  |
| AB vs Bioglass + AB                                                                                                           | 0,920      | 0,090                   | 2,023           | 0,929        | Non          |  |  |
| Bioglass + AB vs BCP +                                                                                                        | 20,900     | 2,042                   | 2,023           | <b>0,048</b> | Oui          |  |  |
| Bioglass + AB vs BC                                                                                                           | 18,100     | 1,769                   | 2,023           | 0,085        | Non          |  |  |
| Bioglass + AB vs EB                                                                                                           | 17,150     | 1,676                   | 2,023           | 0,102        | Non          |  |  |
| Bioglass + AB vs AIB                                                                                                          | 16,600     | 1,622                   | 2,023           | 0,113        | Non          |  |  |
| Bioglass + AB vs AIB + /                                                                                                      | 15,100     | 1,476                   | 2,023           | 0,148        | Non          |  |  |
| Bioglass + AB vs ABB                                                                                                          | 13,000     | 1,270                   | 2,023           | 0,211        | Non          |  |  |
| Bioglass + AB vs ABB +                                                                                                        | 12,100     | 1,182                   | 2,023           | 0,244        | Non          |  |  |
| Bioglass + AB vs BCP                                                                                                          | 11,200     | 1,095                   | 2,023           | 0,280        | Non          |  |  |
| Bioglass + AB vs ABB +                                                                                                        | 9,200      | 0,899                   | 2,023           | 0,374        | Non          |  |  |
| Bioglass + AB vs HA + F                                                                                                       | 9,200      | 0,899                   | 2,023           | 0,374        | Non          |  |  |
| Bioglass + AB vs $\beta$ -TCP                                                                                                 | 8,233      | 0,805                   | 2,023           | 0,426        | Non          |  |  |
| Bioglass + AB vs HA                                                                                                           | 8,033      | 0,785                   | 2,023           | 0,437        | Non          |  |  |
| Bioglass + AB vs ABB +                                                                                                        | 2,900      | 0,283                   | 2,023           | 0,778        | Non          |  |  |
| Bioglass + AB vs $\beta$ -TCP                                                                                                 | 1,333      | 0,130                   | 2,023           | 0,897        | Non          |  |  |
| $\beta$ -TCP vs BCP + PRF                                                                                                     | 19,567     | 1,912                   | 2,023           | 0,063        | Non          |  |  |
| $\beta$ -TCP vs BC                                                                                                            | 16,767     | 1,639                   | 2,023           | 0,109        | Non          |  |  |
| $\beta$ -TCP vs EB                                                                                                            | 15,817     | 1,546                   | 2,023           | 0,130        | Non          |  |  |
| $\beta$ -TCP vs AIB                                                                                                           | 15,267     | 1,492                   | 2,023           | 0,144        | Non          |  |  |
| $\beta$ -TCP vs AIB + ABB                                                                                                     | 13,767     | 1,345                   | 2,023           | 0,186        | Non          |  |  |
| $\beta$ -TCP vs ABB                                                                                                           | 11,667     | 1,140                   | 2,023           | 0,261        | Non          |  |  |
| $\beta$ -TCP vs ABB + PRF                                                                                                     | 10,767     | 1,052                   | 2,023           | 0,299        | Non          |  |  |
| $\beta$ -TCP vs BCP                                                                                                           | 9,867      | 0,964                   | 2,023           | 0,341        | Non          |  |  |
| $\beta$ -TCP vs ABB + BMC                                                                                                     | 7,867      | 0,769                   | 2,023           | 0,447        | Non          |  |  |
| $\beta$ -TCP vs HA + PRF                                                                                                      | 7,867      | 0,769                   | 2,023           | 0,447        | Non          |  |  |
| $\beta$ -TCP vs $\beta$ -TCP + AB                                                                                             | 6,900      | 0,674                   | 2,023           | 0,504        | Non          |  |  |
| $\beta$ -TCP vs HA                                                                                                            | 6,700      | 0,655                   | 2,023           | 0,516        | Non          |  |  |
| $\beta$ -TCP vs ABB + AB                                                                                                      | 1,567      | 0,153                   | 2,023           | 0,879        | Non          |  |  |

|                                     |        |       |       |       |     |
|-------------------------------------|--------|-------|-------|-------|-----|
| ABB + AB vs BCP + PRF               | 18,000 | 1,759 | 2,023 | 0,086 | Non |
| ABB + AB vs BC                      | 15,200 | 1,485 | 2,023 | 0,145 | Non |
| ABB + AB vs EB                      | 14,250 | 1,393 | 2,023 | 0,172 | Non |
| ABB + AB vs AIB                     | 13,700 | 1,339 | 2,023 | 0,188 | Non |
| ABB + AB vs AIB + ABB               | 12,200 | 1,192 | 2,023 | 0,240 | Non |
| ABB + AB vs ABB                     | 10,100 | 0,987 | 2,023 | 0,330 | Non |
| ABB + AB vs ABB + PRF               | 9,200  | 0,899 | 2,023 | 0,374 | Non |
| ABB + AB vs BCP                     | 8,300  | 0,811 | 2,023 | 0,422 | Non |
| ABB + AB vs ABB + BMC               | 6,300  | 0,616 | 2,023 | 0,542 | Non |
| ABB + AB vs HA + PRF                | 6,300  | 0,616 | 2,023 | 0,542 | Non |
| ABB + AB vs $\beta$ -TCP + AIB      | 5,333  | 0,521 | 2,023 | 0,605 | Non |
| ABB + AB vs HA                      | 5,133  | 0,502 | 2,023 | 0,619 | Non |
| HA vs BCP + PRF                     | 12,867 | 1,257 | 2,023 | 0,216 | Non |
| HA vs BC                            | 10,067 | 0,984 | 2,023 | 0,331 | Non |
| HA vs EB                            | 9,117  | 0,891 | 2,023 | 0,378 | Non |
| HA vs AIB                           | 8,567  | 0,837 | 2,023 | 0,408 | Non |
| HA vs AIB + ABB                     | 7,067  | 0,691 | 2,023 | 0,494 | Non |
| HA vs ABB                           | 4,967  | 0,485 | 2,023 | 0,630 | Non |
| HA vs ABB + PRF                     | 4,067  | 0,397 | 2,023 | 0,693 | Non |
| HA vs BCP                           | 3,167  | 0,309 | 2,023 | 0,759 | Non |
| HA vs ABB + BMC                     | 1,167  | 0,114 | 2,023 | 0,910 | Non |
| HA vs HA + PRF                      | 1,167  | 0,114 | 2,023 | 0,910 | Non |
| HA vs $\beta$ -TCP + AB             | 0,200  | 0,020 | 2,023 | 0,985 | Non |
| $\beta$ -TCP + AB vs BCP + PRF      | 12,667 | 1,238 | 2,023 | 0,223 | Non |
| $\beta$ -TCP + AB vs BC             | 9,867  | 0,964 | 2,023 | 0,341 | Non |
| $\beta$ -TCP + AB vs EB             | 8,917  | 0,871 | 2,023 | 0,389 | Non |
| $\beta$ -TCP + AB vs AIB            | 8,367  | 0,818 | 2,023 | 0,419 | Non |
| $\beta$ -TCP + AB vs AIB + ABB      | 6,867  | 0,671 | 2,023 | 0,506 | Non |
| $\beta$ -TCP + AB vs ABB            | 4,767  | 0,466 | 2,023 | 0,644 | Non |
| $\beta$ -TCP + AB vs ABB + PRF      | 3,867  | 0,378 | 2,023 | 0,708 | Non |
| $\beta$ -TCP + AB vs BCP            | 2,967  | 0,290 | 2,023 | 0,773 | Non |
| $\beta$ -TCP + AB vs ABB + BMC      | 0,967  | 0,094 | 2,023 | 0,925 | Non |
| $\beta$ -TCP + AB vs HA + PRF       | 0,967  | 0,094 | 2,023 | 0,925 | Non |
| HA + PRF vs BCP + PRF               | 11,700 | 1,143 | 2,023 | 0,260 | Non |
| HA + PRF vs BC                      | 8,900  | 0,870 | 2,023 | 0,390 | Non |
| HA + PRF vs EB                      | 7,950  | 0,777 | 2,023 | 0,442 | Non |
| HA + PRF vs AIB                     | 7,400  | 0,723 | 2,023 | 0,474 | Non |
| HA + PRF vs AIB + ABB               | 5,900  | 0,577 | 2,023 | 0,568 | Non |
| HA + PRF vs ABB                     | 3,800  | 0,371 | 2,023 | 0,712 | Non |
| HA + PRF vs ABB + PRF               | 2,900  | 0,283 | 2,023 | 0,778 | Non |
| HA + PRF vs BCP                     | 2,000  | 0,195 | 2,023 | 0,846 | Non |
| HA + PRF vs ABB + BMC               | 0,000  | 0,000 | 2,023 | 1,000 | Non |
| ABB + BMC vs BCP + PRF              | 11,700 | 1,143 | 2,023 | 0,260 | Non |
| ABB + BMC vs BC                     | 8,900  | 0,870 | 2,023 | 0,390 | Non |
| ABB + BMC vs EB                     | 7,950  | 0,777 | 2,023 | 0,442 | Non |
| ABB + BMC vs AIB                    | 7,400  | 0,723 | 2,023 | 0,474 | Non |
| ABB + BMC vs AIB + ABB              | 5,900  | 0,577 | 2,023 | 0,568 | Non |
| ABB + BMC vs ABB                    | 3,800  | 0,371 | 2,023 | 0,712 | Non |
| ABB + BMC vs ABB + PRF              | 2,900  | 0,283 | 2,023 | 0,778 | Non |
| ABB + BMC vs BCP                    | 2,000  | 0,195 | 2,023 | 0,846 | Non |
| BCP vs BCP + PRF                    | 9,700  | 0,948 | 2,023 | 0,349 | Non |
| BCP vs BC                           | 6,900  | 0,674 | 2,023 | 0,504 | Non |
| BCP vs EB                           | 5,950  | 0,581 | 2,023 | 0,564 | Non |
| BCP vs AIB                          | 5,400  | 0,528 | 2,023 | 0,601 | Non |
| BCP vs AIB + ABB                    | 3,900  | 0,381 | 2,023 | 0,705 | Non |
| BCP vs ABB                          | 1,800  | 0,176 | 2,023 | 0,861 | Non |
| BCP vs ABB + PRF                    | 0,900  | 0,088 | 2,023 | 0,930 | Non |
| ABB + PRF vs BCP + PRF              | 8,800  | 0,860 | 2,023 | 0,395 | Non |
| ABB + PRF vs BC                     | 6,000  | 0,586 | 2,023 | 0,561 | Non |
| ABB + PRF vs EB                     | 5,050  | 0,494 | 2,023 | 0,624 | Non |
| ABB + PRF vs AIB                    | 4,500  | 0,440 | 2,023 | 0,663 | Non |
| ABB + PRF vs AIB + ABB              | 3,000  | 0,293 | 2,023 | 0,771 | Non |
| ABB + PRF vs ABB                    | 0,900  | 0,088 | 2,023 | 0,930 | Non |
| ABB vs BCP + PRF                    | 7,900  | 0,772 | 2,023 | 0,445 | Non |
| ABB vs BC                           | 5,100  | 0,498 | 2,023 | 0,621 | Non |
| ABB vs EB                           | 4,150  | 0,406 | 2,023 | 0,687 | Non |
| ABB vs AIB                          | 3,600  | 0,352 | 2,023 | 0,727 | Non |
| ABB vs AIB + ABB                    | 2,100  | 0,205 | 2,023 | 0,838 | Non |
| AIB + ABB vs BCP + PRF              | 5,800  | 0,567 | 2,023 | 0,574 | Non |
| AIB + ABB vs BC                     | 3,000  | 0,293 | 2,023 | 0,771 | Non |
| AIB + ABB vs EB                     | 2,050  | 0,200 | 2,023 | 0,842 | Non |
| AIB + ABB vs AIB                    | 1,500  | 0,147 | 2,023 | 0,884 | Non |
| AIB vs BCP + PRF                    | 4,300  | 0,420 | 2,023 | 0,677 | Non |
| AIB vs BC                           | 1,500  | 0,147 | 2,023 | 0,884 | Non |
| AIB vs EB                           | 0,550  | 0,054 | 2,023 | 0,957 | Non |
| EB vs BCP + PRF                     | 3,750  | 0,366 | 2,023 | 0,716 | Non |
| EB vs BC                            | 0,950  | 0,093 | 2,023 | 0,927 | Non |
| BC vs BCP + PRF                     | 2,800  | 0,274 | 2,023 | 0,786 | Non |
| Différence significative minimale : |        |       | 7,527 |       |     |

## Supplementary S2: ANOVA Fischer test connective tissue quantity and residual graft ratio comparison

| Type de greffe / Fisher (LSD) / Analyse des différences entre les modalités avec un intervalle de confiance à 95% (Quantité de tissus de connexion (%)) : |            |                         |                 |              |              |
|-----------------------------------------------------------------------------------------------------------------------------------------------------------|------------|-------------------------|-----------------|--------------|--------------|
| Contraste                                                                                                                                                 | Différence | Différence standardisée | Valeur critique | Pr > Diff    | Significatif |
| ABB + AIB vs $\beta$ -TCP + PRF                                                                                                                           | 22,500     | 2,399                   | 2,110           | <b>0,028</b> | Oui          |
| ABB + AIB vs $\beta$ -TCP                                                                                                                                 | 21,600     | 2,303                   | 2,110           | <b>0,034</b> | Oui          |
| ABB + AIB vs BCP                                                                                                                                          | 17,333     | 2,263                   | 2,110           | <b>0,037</b> | Oui          |
| ABB + AIB vs ABB + AB                                                                                                                                     | 14,000     | 1,492                   | 2,110           | 0,154        | Non          |
| ABB + AIB vs APB                                                                                                                                          | 13,800     | 1,471                   | 2,110           | 0,160        | Non          |
| ABB + AIB vs HA                                                                                                                                           | 13,350     | 1,643                   | 2,110           | 0,119        | Non          |
| ABB + AIB vs ABB                                                                                                                                          | 11,683     | 1,631                   | 2,110           | 0,121        | Non          |
| ABB + AIB vs ABB + AB                                                                                                                                     | 11,467     | 1,497                   | 2,110           | 0,153        | Non          |
| ABB + AIB vs AB                                                                                                                                           | 10,625     | 1,433                   | 2,110           | 0,170        | Non          |
| ABB + AIB vs AIB + AB                                                                                                                                     | 9,150      | 1,126                   | 2,110           | 0,276        | Non          |
| ABB + AIB vs Bioglass                                                                                                                                     | 8,800      | 0,938                   | 2,110           | 0,361        | Non          |
| ABB + AIB vs AIB                                                                                                                                          | 6,833      | 0,892                   | 2,110           | 0,385        | Non          |
| ABB + AIB vs EB                                                                                                                                           | 6,800      | 0,837                   | 2,110           | 0,414        | Non          |
| ABB + AIB vs ABB + PRF                                                                                                                                    | 5,100      | 0,544                   | 2,110           | 0,594        | Non          |
| ABB + PRF vs $\beta$ -TCP + PRF                                                                                                                           | 17,400     | 1,855                   | 2,110           | 0,081        | Non          |
| ABB + PRF vs $\beta$ -TCP                                                                                                                                 | 16,500     | 1,759                   | 2,110           | 0,097        | Non          |
| ABB + PRF vs BCP                                                                                                                                          | 12,233     | 1,597                   | 2,110           | 0,129        | Non          |
| ABB + PRF vs ABB + AB                                                                                                                                     | 8,900      | 0,949                   | 2,110           | 0,356        | Non          |
| ABB + PRF vs APB                                                                                                                                          | 8,700      | 0,927                   | 2,110           | 0,367        | Non          |
| ABB + PRF vs HA                                                                                                                                           | 8,250      | 1,016                   | 2,110           | 0,324        | Non          |
| ABB + PRF vs ABB                                                                                                                                          | 6,583      | 0,919                   | 2,110           | 0,371        | Non          |
| ABB + PRF vs ABB + AB                                                                                                                                     | 6,367      | 0,831                   | 2,110           | 0,417        | Non          |
| ABB + PRF vs AB                                                                                                                                           | 5,525      | 0,745                   | 2,110           | 0,466        | Non          |
| ABB + PRF vs AIB + AB                                                                                                                                     | 4,050      | 0,499                   | 2,110           | 0,624        | Non          |
| ABB + PRF vs Bioglass                                                                                                                                     | 3,700      | 0,394                   | 2,110           | 0,698        | Non          |
| ABB + PRF vs AIB                                                                                                                                          | 1,733      | 0,226                   | 2,110           | 0,824        | Non          |
| ABB + PRF vs EB                                                                                                                                           | 1,700      | 0,209                   | 2,110           | 0,837        | Non          |
| EB vs $\beta$ -TCP + PRF                                                                                                                                  | 15,700     | 1,933                   | 2,110           | 0,070        | Non          |
| EB vs $\beta$ -TCP                                                                                                                                        | 14,800     | 1,822                   | 2,110           | 0,086        | Non          |
| EB vs BCP                                                                                                                                                 | 10,533     | 1,740                   | 2,110           | 0,100        | Non          |
| EB vs ABB + AB                                                                                                                                            | 7,200      | 0,886                   | 2,110           | 0,388        | Non          |
| EB vs APB                                                                                                                                                 | 7,000      | 0,862                   | 2,110           | 0,401        | Non          |
| EB vs HA                                                                                                                                                  | 6,550      | 0,987                   | 2,110           | 0,337        | Non          |
| EB vs ABB                                                                                                                                                 | 4,883      | 0,902                   | 2,110           | 0,380        | Non          |
| EB vs ABB + AB                                                                                                                                            | 4,667      | 0,771                   | 2,110           | 0,451        | Non          |
| EB vs AB                                                                                                                                                  | 3,825      | 0,666                   | 2,110           | 0,514        | Non          |
| EB vs AIB + AB                                                                                                                                            | 2,350      | 0,354                   | 2,110           | 0,727        | Non          |
| EB vs Bioglass                                                                                                                                            | 2,000      | 0,246                   | 2,110           | 0,808        | Non          |
| EB vs AIB                                                                                                                                                 | 0,033      | 0,006                   | 2,110           | 0,996        | Non          |
| AIB vs $\beta$ -TCP + PRF                                                                                                                                 | 15,667     | 2,045                   | 2,110           | 0,057        | Non          |
| AIB vs $\beta$ -TCP                                                                                                                                       | 14,767     | 1,928                   | 2,110           | 0,071        | Non          |
| AIB vs BCP                                                                                                                                                | 10,500     | 1,939                   | 2,110           | 0,069        | Non          |
| AIB vs ABB + AB                                                                                                                                           | 7,167      | 0,936                   | 2,110           | 0,363        | Non          |
| AIB vs APB                                                                                                                                                | 6,967      | 0,910                   | 2,110           | 0,376        | Non          |
| AIB vs HA                                                                                                                                                 | 6,517      | 1,076                   | 2,110           | 0,297        | Non          |
| AIB vs ABB                                                                                                                                                | 4,850      | 1,034                   | 2,110           | 0,316        | Non          |
| AIB vs ABB + AB                                                                                                                                           | 4,633      | 0,856                   | 2,110           | 0,404        | Non          |
| AIB vs AB                                                                                                                                                 | 3,792      | 0,748                   | 2,110           | 0,464        | Non          |
| AIB vs AIB + AB                                                                                                                                           | 2,317      | 0,383                   | 2,110           | 0,707        | Non          |
| AIB vs Bioglass                                                                                                                                           | 1,967      | 0,257                   | 2,110           | 0,800        | Non          |
| Bioglass vs $\beta$ -TCP + PRF                                                                                                                            | 13,700     | 1,460                   | 2,110           | 0,162        | Non          |
| Bioglass vs $\beta$ -TCP                                                                                                                                  | 12,800     | 1,365                   | 2,110           | 0,190        | Non          |
| Bioglass vs BCP                                                                                                                                           | 8,533      | 1,114                   | 2,110           | 0,281        | Non          |
| Bioglass vs ABB + AB                                                                                                                                      | 5,200      | 0,554                   | 2,110           | 0,587        | Non          |
| Bioglass vs APB                                                                                                                                           | 5,000      | 0,533                   | 2,110           | 0,601        | Non          |
| Bioglass vs HA                                                                                                                                            | 4,550      | 0,560                   | 2,110           | 0,583        | Non          |
| Bioglass vs ABB                                                                                                                                           | 2,883      | 0,402                   | 2,110           | 0,692        | Non          |
| Bioglass vs ABB + AB                                                                                                                                      | 2,667      | 0,348                   | 2,110           | 0,732        | Non          |
| Bioglass vs AB                                                                                                                                            | 1,825      | 0,246                   | 2,110           | 0,809        | Non          |
| Bioglass vs AIB + AB                                                                                                                                      | 0,350      | 0,043                   | 2,110           | 0,966        | Non          |
| AIB + AB vs $\beta$ -TCP + PRF                                                                                                                            | 13,350     | 1,643                   | 2,110           | 0,119        | Non          |
| AIB + AB vs $\beta$ -TCP                                                                                                                                  | 12,450     | 1,533                   | 2,110           | 0,144        | Non          |
| AIB + AB vs BCP                                                                                                                                           | 8,183      | 1,351                   | 2,110           | 0,194        | Non          |
| AIB + AB vs ABB + AB                                                                                                                                      | 4,850      | 0,597                   | 2,110           | 0,558        | Non          |
| AIB + AB vs APB                                                                                                                                           | 4,650      | 0,572                   | 2,110           | 0,575        | Non          |
| AIB + AB vs HA                                                                                                                                            | 4,200      | 0,633                   | 2,110           | 0,535        | Non          |
| AIB + AB vs ABB                                                                                                                                           | 2,533      | 0,468                   | 2,110           | 0,646        | Non          |
| AIB + AB vs ABB + AB                                                                                                                                      | 2,317      | 0,383                   | 2,110           | 0,707        | Non          |
| AIB + AB vs AB                                                                                                                                            | 1,475      | 0,257                   | 2,110           | 0,800        | Non          |
| AB vs $\beta$ -TCP + PRF                                                                                                                                  | 11,875     | 1,601                   | 2,110           | 0,128        | Non          |
| AB vs $\beta$ -TCP                                                                                                                                        | 10,975     | 1,480                   | 2,110           | 0,157        | Non          |
| AB vs BCP                                                                                                                                                 | 6,708      | 1,324                   | 2,110           | 0,203        | Non          |
| AB vs ABB + AB                                                                                                                                            | 3,375      | 0,455                   | 2,110           | 0,655        | Non          |
| AB vs APB                                                                                                                                                 | 3,175      | 0,428                   | 2,110           | 0,674        | Non          |
| AB vs HA                                                                                                                                                  | 2,725      | 0,474                   | 2,110           | 0,641        | Non          |
| AB vs ABB                                                                                                                                                 | 1,058      | 0,247                   | 2,110           | 0,808        | Non          |
| AB vs ABB + AB                                                                                                                                            | 0,842      | 0,166                   | 2,110           | 0,870        | Non          |
| ABB + AB vs $\beta$ -TCP + PRF                                                                                                                            | 11,033     | 1,441                   | 2,110           | 0,168        | Non          |
| ABB + AB vs $\beta$ -TCP                                                                                                                                  | 10,133     | 1,323                   | 2,110           | 0,203        | Non          |
| ABB + AB vs BCP                                                                                                                                           | 5,867      | 1,083                   | 2,110           | 0,294        | Non          |
| ABB + AB vs ABB + AB                                                                                                                                      | 2,533      | 0,331                   | 2,110           | 0,745        | Non          |
| ABB + AB vs APB                                                                                                                                           | 2,333      | 0,305                   | 2,110           | 0,764        | Non          |
| ABB + AB vs HA                                                                                                                                            | 1,883      | 0,311                   | 2,110           | 0,760        | Non          |
| ABB + AB vs ABB                                                                                                                                           | 0,217      | 0,046                   | 2,110           | 0,964        | Non          |
| ABB vs $\beta$ -TCP + PRF                                                                                                                                 | 10,817     | 1,510                   | 2,110           | 0,149        | Non          |
| ABB vs $\beta$ -TCP                                                                                                                                       | 9,917      | 1,384                   | 2,110           | 0,184        | Non          |
| ABB vs BCP                                                                                                                                                | 5,650      | 1,205                   | 2,110           | 0,245        | Non          |
| ABB vs ABB + AB                                                                                                                                           | 2,317      | 0,323                   | 2,110           | 0,750        | Non          |
| ABB vs APB                                                                                                                                                | 2,117      | 0,295                   | 2,110           | 0,771        | Non          |
| ABB vs HA                                                                                                                                                 | 1,667      | 0,308                   | 2,110           | 0,762        | Non          |
| HA vs $\beta$ -TCP + PRF                                                                                                                                  | 9,150      | 1,126                   | 2,110           | 0,276        | Non          |
| HA vs $\beta$ -TCP                                                                                                                                        | 8,250      | 1,016                   | 2,110           | 0,324        | Non          |
| HA vs BCP                                                                                                                                                 | 3,983      | 0,658                   | 2,110           | 0,519        | Non          |
| HA vs ABB + AB                                                                                                                                            | 0,650      | 0,080                   | 2,110           | 0,937        | Non          |
| HA vs APB                                                                                                                                                 | 0,450      | 0,055                   | 2,110           | 0,956        | Non          |
| APB vs $\beta$ -TCP + PRF                                                                                                                                 | 8,700      | 0,927                   | 2,110           | 0,367        | Non          |
| APB vs $\beta$ -TCP                                                                                                                                       | 7,800      | 0,832                   | 2,110           | 0,417        | Non          |
| APB vs BCP                                                                                                                                                | 3,533      | 0,461                   | 2,110           | 0,650        | Non          |
| APB vs ABB + AB                                                                                                                                           | 0,200      | 0,021                   | 2,110           | 0,983        | Non          |
| ABB + AB vs $\beta$ -TCP + PRF                                                                                                                            | 8,500      | 0,906                   | 2,110           | 0,378        | Non          |
| ABB + AB vs $\beta$ -TCP                                                                                                                                  | 7,600      | 0,810                   | 2,110           | 0,429        | Non          |
| ABB + AB vs BCP                                                                                                                                           | 3,333      | 0,435                   | 2,110           | 0,669        | Non          |
| BCP vs $\beta$ -TCP + PRF                                                                                                                                 | 5,167      | 0,675                   | 2,110           | 0,509        | Non          |
| BCP vs $\beta$ -TCP                                                                                                                                       | 4,267      | 0,557                   | 2,110           | 0,585        | Non          |
| $\beta$ -TCP vs $\beta$ -TCP + PRF                                                                                                                        | 0,900      | 0,096                   | 2,110           | 0,925        | Non          |
| Différence significative minimale :                                                                                                                       |            |                         | 8,08            |              |              |

### Supplementary S3: ANOVA Fischer test bone residual graft ratio comparison

| Type de greffe / Fisher (LSD) / Analyse des différences entre les modalités avec un intervalle de confiance à 95% (Quantité greffe résidu) |            |                         |                 |              |              |
|--------------------------------------------------------------------------------------------------------------------------------------------|------------|-------------------------|-----------------|--------------|--------------|
|                                                                                                                                            | Différence | Différence standardisée | Valeur critique | Pr > Diff    | Significatif |
| BCP vs AB                                                                                                                                  | 17,700     | 2,546                   | 2,145           | <b>0,023</b> | Oui          |
| BCP vs AIB + AB                                                                                                                            | 16,900     | 2,430                   | 2,145           | <b>0,029</b> | Oui          |
| BCP vs ABB + AB                                                                                                                            | 14,700     | 2,114                   | 2,145           | 0,053        | Non          |
| BCP vs Bioglass                                                                                                                            | 13,300     | 1,913                   | 2,145           | 0,076        | Non          |
| BCP vs AIB                                                                                                                                 | 12,000     | 1,726                   | 2,145           | 0,106        | Non          |
| BCP vs ABB + AB                                                                                                                            | 11,600     | 1,668                   | 2,145           | 0,117        | Non          |
| BCP vs ABB + AIB                                                                                                                           | 8,000      | 1,151                   | 2,145           | 0,269        | Non          |
| BCP vs ABB + PRF                                                                                                                           | 7,400      | 1,064                   | 2,145           | 0,305        | Non          |
| BCP vs EB                                                                                                                                  | 6,650      | 0,956                   | 2,145           | 0,355        | Non          |
| BCP vs ABB                                                                                                                                 | 3,060      | 0,440                   | 2,145           | 0,667        | Non          |
| BCP vs $\beta$ -TCP                                                                                                                        | 2,900      | 0,417                   | 2,145           | 0,683        | Non          |
| BCP vs HA                                                                                                                                  | 2,100      | 0,302                   | 2,145           | 0,767        | Non          |
| BCP vs $\beta$ -TCP + PRF                                                                                                                  | 0,600      | 0,086                   | 2,145           | 0,932        | Non          |
| $\beta$ -TCP + PRF vs AB                                                                                                                   | 17,100     | 2,459                   | 2,145           | <b>0,028</b> | Oui          |
| $\beta$ -TCP + PRF vs AIB + AB                                                                                                             | 16,300     | 2,344                   | 2,145           | <b>0,034</b> | Oui          |
| $\beta$ -TCP + PRF vs ABB + AB                                                                                                             | 14,100     | 2,028                   | 2,145           | 0,062        | Non          |
| $\beta$ -TCP + PRF vs Bioglass                                                                                                             | 12,700     | 1,826                   | 2,145           | 0,089        | Non          |
| $\beta$ -TCP + PRF vs AIB                                                                                                                  | 11,400     | 1,639                   | 2,145           | 0,123        | Non          |
| $\beta$ -TCP + PRF vs ABB + AB                                                                                                             | 11,000     | 1,582                   | 2,145           | 0,136        | Non          |
| $\beta$ -TCP + PRF vs ABB + AIB                                                                                                            | 7,400      | 1,064                   | 2,145           | 0,305        | Non          |
| $\beta$ -TCP + PRF vs ABB + PRF                                                                                                            | 6,800      | 0,978                   | 2,145           | 0,345        | Non          |
| $\beta$ -TCP + PRF vs EB                                                                                                                   | 6,050      | 0,870                   | 2,145           | 0,399        | Non          |
| $\beta$ -TCP + PRF vs ABB                                                                                                                  | 2,460      | 0,354                   | 2,145           | 0,729        | Non          |
| $\beta$ -TCP + PRF vs $\beta$ -TCP                                                                                                         | 2,300      | 0,331                   | 2,145           | 0,746        | Non          |
| $\beta$ -TCP + PRF vs HA                                                                                                                   | 1,500      | 0,216                   | 2,145           | 0,832        | Non          |
| HA vs AB                                                                                                                                   | 15,600     | 2,243                   | 2,145           | <b>0,042</b> | Oui          |
| HA vs AIB + AB                                                                                                                             | 14,800     | 2,128                   | 2,145           | 0,052        | Non          |
| HA vs ABB + AB                                                                                                                             | 12,600     | 1,812                   | 2,145           | 0,091        | Non          |
| HA vs Bioglass                                                                                                                             | 11,200     | 1,611                   | 2,145           | 0,130        | Non          |
| HA vs AIB                                                                                                                                  | 9,900      | 1,424                   | 2,145           | 0,176        | Non          |
| HA vs ABB + AB                                                                                                                             | 9,500      | 1,366                   | 2,145           | 0,193        | Non          |
| HA vs ABB + AIB                                                                                                                            | 5,900      | 0,849                   | 2,145           | 0,410        | Non          |
| HA vs ABB + PRF                                                                                                                            | 5,300      | 0,762                   | 2,145           | 0,459        | Non          |
| HA vs EB                                                                                                                                   | 4,550      | 0,654                   | 2,145           | 0,523        | Non          |
| HA vs ABB                                                                                                                                  | 0,960      | 0,138                   | 2,145           | 0,892        | Non          |
| HA vs $\beta$ -TCP                                                                                                                         | 0,800      | 0,115                   | 2,145           | 0,910        | Non          |
| $\beta$ -TCP vs AB                                                                                                                         | 14,800     | 2,128                   | 2,145           | 0,052        | Non          |
| $\beta$ -TCP vs AIB + AB                                                                                                                   | 14,000     | 2,013                   | 2,145           | 0,064        | Non          |
| $\beta$ -TCP vs ABB + AB                                                                                                                   | 11,800     | 1,697                   | 2,145           | 0,112        | Non          |
| $\beta$ -TCP vs Bioglass                                                                                                                   | 10,400     | 1,496                   | 2,145           | 0,157        | Non          |
| $\beta$ -TCP vs AIB                                                                                                                        | 9,100      | 1,309                   | 2,145           | 0,212        | Non          |
| $\beta$ -TCP vs ABB + AB                                                                                                                   | 8,700      | 1,251                   | 2,145           | 0,231        | Non          |
| $\beta$ -TCP vs ABB + AIB                                                                                                                  | 5,100      | 0,733                   | 2,145           | 0,475        | Non          |
| $\beta$ -TCP vs ABB + PRF                                                                                                                  | 4,500      | 0,647                   | 2,145           | 0,528        | Non          |
| $\beta$ -TCP vs EB                                                                                                                         | 3,750      | 0,539                   | 2,145           | 0,598        | Non          |
| $\beta$ -TCP vs ABB                                                                                                                        | 0,160      | 0,023                   | 2,145           | 0,982        | Non          |
| ABB vs AB                                                                                                                                  | 14,640     | 2,105                   | 2,145           | 0,054        | Non          |
| ABB vs AIB + AB                                                                                                                            | 13,840     | 1,990                   | 2,145           | 0,066        | Non          |
| ABB vs ABB + AB                                                                                                                            | 11,640     | 1,674                   | 2,145           | 0,116        | Non          |
| ABB vs Bioglass                                                                                                                            | 10,240     | 1,473                   | 2,145           | 0,163        | Non          |
| ABB vs AIB                                                                                                                                 | 8,940      | 1,286                   | 2,145           | 0,219        | Non          |
| ABB vs ABB + AB                                                                                                                            | 8,540      | 1,228                   | 2,145           | 0,240        | Non          |
| ABB vs ABB + AIB                                                                                                                           | 4,940      | 0,710                   | 2,145           | 0,489        | Non          |
| ABB vs ABB + PRF                                                                                                                           | 4,340      | 0,624                   | 2,145           | 0,543        | Non          |
| ABB vs EB                                                                                                                                  | 3,590      | 0,516                   | 2,145           | 0,614        | Non          |
| EB vs AB                                                                                                                                   | 11,050     | 1,589                   | 2,145           | 0,134        | Non          |
| EB vs AIB + AB                                                                                                                             | 10,250     | 1,474                   | 2,145           | 0,163        | Non          |
| EB vs ABB + AB                                                                                                                             | 8,050      | 1,158                   | 2,145           | 0,266        | Non          |
| EB vs Bioglass                                                                                                                             | 6,650      | 0,956                   | 2,145           | 0,355        | Non          |
| EB vs AIB                                                                                                                                  | 5,350      | 0,769                   | 2,145           | 0,454        | Non          |
| EB vs ABB + AB                                                                                                                             | 4,950      | 0,712                   | 2,145           | 0,488        | Non          |
| EB vs ABB + AIB                                                                                                                            | 1,350      | 0,194                   | 2,145           | 0,849        | Non          |
| EB vs ABB + PRF                                                                                                                            | 0,750      | 0,108                   | 2,145           | 0,916        | Non          |
| ABB + PRF vs AB                                                                                                                            | 10,300     | 1,481                   | 2,145           | 0,161        | Non          |
| ABB + PRF vs AIB + AB                                                                                                                      | 9,500      | 1,366                   | 2,145           | 0,193        | Non          |
| ABB + PRF vs ABB + AB                                                                                                                      | 7,300      | 1,050                   | 2,145           | 0,312        | Non          |
| ABB + PRF vs Bioglass                                                                                                                      | 5,900      | 0,849                   | 2,145           | 0,410        | Non          |
| ABB + PRF vs AIB                                                                                                                           | 4,600      | 0,662                   | 2,145           | 0,519        | Non          |
| ABB + PRF vs ABB + AB                                                                                                                      | 4,200      | 0,604                   | 2,145           | 0,555        | Non          |
| ABB + PRF vs ABB + AIB                                                                                                                     | 0,600      | 0,086                   | 2,145           | 0,932        | Non          |
| ABB + AIB vs AB                                                                                                                            | 9,700      | 1,395                   | 2,145           | 0,185        | Non          |
| ABB + AIB vs AIB + AB                                                                                                                      | 8,900      | 1,280                   | 2,145           | 0,221        | Non          |
| ABB + AIB vs ABB + AB                                                                                                                      | 6,700      | 0,964                   | 2,145           | 0,352        | Non          |
| ABB + AIB vs Bioglass                                                                                                                      | 5,300      | 0,762                   | 2,145           | 0,459        | Non          |
| ABB + AIB vs AIB                                                                                                                           | 4,000      | 0,575                   | 2,145           | 0,574        | Non          |
| ABB + AIB vs ABB + AB                                                                                                                      | 3,600      | 0,518                   | 2,145           | 0,613        | Non          |
| ABB + AB vs AB                                                                                                                             | 6,100      | 0,877                   | 2,145           | 0,395        | Non          |
| ABB + AB vs AIB + AB                                                                                                                       | 5,300      | 0,762                   | 2,145           | 0,459        | Non          |
| ABB + AB vs ABB + AB                                                                                                                       | 3,100      | 0,446                   | 2,145           | 0,663        | Non          |
| ABB + AB vs Bioglass                                                                                                                       | 1,700      | 0,244                   | 2,145           | 0,810        | Non          |
| ABB + AB vs AIB                                                                                                                            | 0,400      | 0,058                   | 2,145           | 0,955        | Non          |
| AIB vs AB                                                                                                                                  | 5,700      | 0,820                   | 2,145           | 0,426        | Non          |
| AIB vs AIB + AB                                                                                                                            | 4,900      | 0,705                   | 2,145           | 0,493        | Non          |
| AIB vs ABB + AB                                                                                                                            | 2,700      | 0,388                   | 2,145           | 0,704        | Non          |
| AIB vs Bioglass                                                                                                                            | 1,300      | 0,187                   | 2,145           | 0,854        | Non          |
| Bioglass vs AB                                                                                                                             | 4,400      | 0,633                   | 2,145           | 0,537        | Non          |
| Bioglass vs AIB + AB                                                                                                                       | 3,600      | 0,518                   | 2,145           | 0,613        | Non          |
| Bioglass vs ABB + AB                                                                                                                       | 1,400      | 0,201                   | 2,145           | 0,843        | Non          |
| ABB + AB vs AB                                                                                                                             | 3,000      | 0,431                   | 2,145           | 0,673        | Non          |
| ABB + AB vs AIB + AB                                                                                                                       | 2,200      | 0,316                   | 2,145           | 0,756        | Non          |
| AIB + AB vs AB                                                                                                                             | 0,800      | 0,115                   | 2,145           | 0,910        | Non          |
| Différence significative minimale :                                                                                                        |            |                         | 8,228           |              |              |

## Supplementary S4: ANOVA Fischer test bone resorption ratio graft ratio comparison

| Type de greffe / Fisher (LSD) / Analyse des différences entre les modalités avec un intervalle de confiance à 95% (Moyenne Résorption osseuse (%)) : |            |                         |                 |           |              |
|------------------------------------------------------------------------------------------------------------------------------------------------------|------------|-------------------------|-----------------|-----------|--------------|
| Contraste                                                                                                                                            | Différence | Différence standardisée | Valeur critique | Pr > Diff | Significatif |
| AB vs ABB                                                                                                                                            | 18,533     | 1,605                   | 2,776           | 0,184     | Non          |
| AB vs HA                                                                                                                                             | 17,200     | 1,110                   | 2,776           | 0,329     | Non          |
| AB vs AIB                                                                                                                                            | 15,950     | 1,261                   | 2,776           | 0,276     | Non          |
| AB vs ABB + AB                                                                                                                                       | 8,700      | 0,561                   | 2,776           | 0,604     | Non          |
| AB vs Bioglass + AB                                                                                                                                  | 7,800      | 0,503                   | 2,776           | 0,641     | Non          |
| AB vs $\beta$ -TCP + AB                                                                                                                              | 7,400      | 0,478                   | 2,776           | 0,658     | Non          |
| AB vs $\beta$ -TCP                                                                                                                                   | 1,900      | 0,123                   | 2,776           | 0,908     | Non          |
| AB vs Bioglass                                                                                                                                       | 1,700      | 0,110                   | 2,776           | 0,918     | Non          |
| Bioglass vs ABB                                                                                                                                      | 16,833     | 1,152                   | 2,776           | 0,313     | Non          |
| Bioglass vs HA                                                                                                                                       | 15,500     | 0,866                   | 2,776           | 0,435     | Non          |
| Bioglass vs AIB                                                                                                                                      | 14,250     | 0,920                   | 2,776           | 0,410     | Non          |
| Bioglass vs ABB + AB                                                                                                                                 | 7,000      | 0,391                   | 2,776           | 0,716     | Non          |
| Bioglass vs Bioglass + AB                                                                                                                            | 6,100      | 0,341                   | 2,776           | 0,750     | Non          |
| Bioglass vs $\beta$ -TCP + AB                                                                                                                        | 5,700      | 0,319                   | 2,776           | 0,766     | Non          |
| Bioglass vs $\beta$ -TCP                                                                                                                             | 0,200      | 0,011                   | 2,776           | 0,992     | Non          |
| $\beta$ -TCP vs ABB                                                                                                                                  | 16,633     | 1,139                   | 2,776           | 0,318     | Non          |
| $\beta$ -TCP vs HA                                                                                                                                   | 15,300     | 0,855                   | 2,776           | 0,441     | Non          |
| $\beta$ -TCP vs AIB                                                                                                                                  | 14,050     | 0,907                   | 2,776           | 0,416     | Non          |
| $\beta$ -TCP vs ABB + AB                                                                                                                             | 6,800      | 0,380                   | 2,776           | 0,723     | Non          |
| $\beta$ -TCP vs Bioglass + AB                                                                                                                        | 5,900      | 0,330                   | 2,776           | 0,758     | Non          |
| $\beta$ -TCP vs $\beta$ -TCP + AB                                                                                                                    | 5,500      | 0,307                   | 2,776           | 0,774     | Non          |
| $\beta$ -TCP + AB vs ABB                                                                                                                             | 11,133     | 0,762                   | 2,776           | 0,488     | Non          |
| $\beta$ -TCP + AB vs HA                                                                                                                              | 9,800      | 0,548                   | 2,776           | 0,613     | Non          |
| $\beta$ -TCP + AB vs AIB                                                                                                                             | 8,550      | 0,552                   | 2,776           | 0,610     | Non          |
| $\beta$ -TCP + AB vs ABB + AB                                                                                                                        | 1,300      | 0,073                   | 2,776           | 0,946     | Non          |
| $\beta$ -TCP + AB vs Bioglass + AB                                                                                                                   | 0,400      | 0,022                   | 2,776           | 0,983     | Non          |
| Bioglass + AB vs ABB                                                                                                                                 | 10,733     | 0,735                   | 2,776           | 0,503     | Non          |
| Bioglass + AB vs HA                                                                                                                                  | 9,400      | 0,525                   | 2,776           | 0,627     | Non          |
| Bioglass + AB vs AIB                                                                                                                                 | 8,150      | 0,526                   | 2,776           | 0,627     | Non          |
| Bioglass + AB vs ABB + AB                                                                                                                            | 0,900      | 0,050                   | 2,776           | 0,962     | Non          |
| ABB + AB vs ABB                                                                                                                                      | 9,833      | 0,673                   | 2,776           | 0,538     | Non          |
| ABB + AB vs HA                                                                                                                                       | 8,500      | 0,475                   | 2,776           | 0,660     | Non          |
| ABB + AB vs AIB                                                                                                                                      | 7,250      | 0,468                   | 2,776           | 0,664     | Non          |
| AIB vs ABB                                                                                                                                           | 2,583      | 0,224                   | 2,776           | 0,834     | Non          |
| AIB vs HA                                                                                                                                            | 1,250      | 0,081                   | 2,776           | 0,940     | Non          |
| HA vs ABB                                                                                                                                            | 1,333      | 0,091                   | 2,776           | 0,932     | Non          |
| Différence significative minimale :                                                                                                                  |            |                         | 28,682          |           |              |

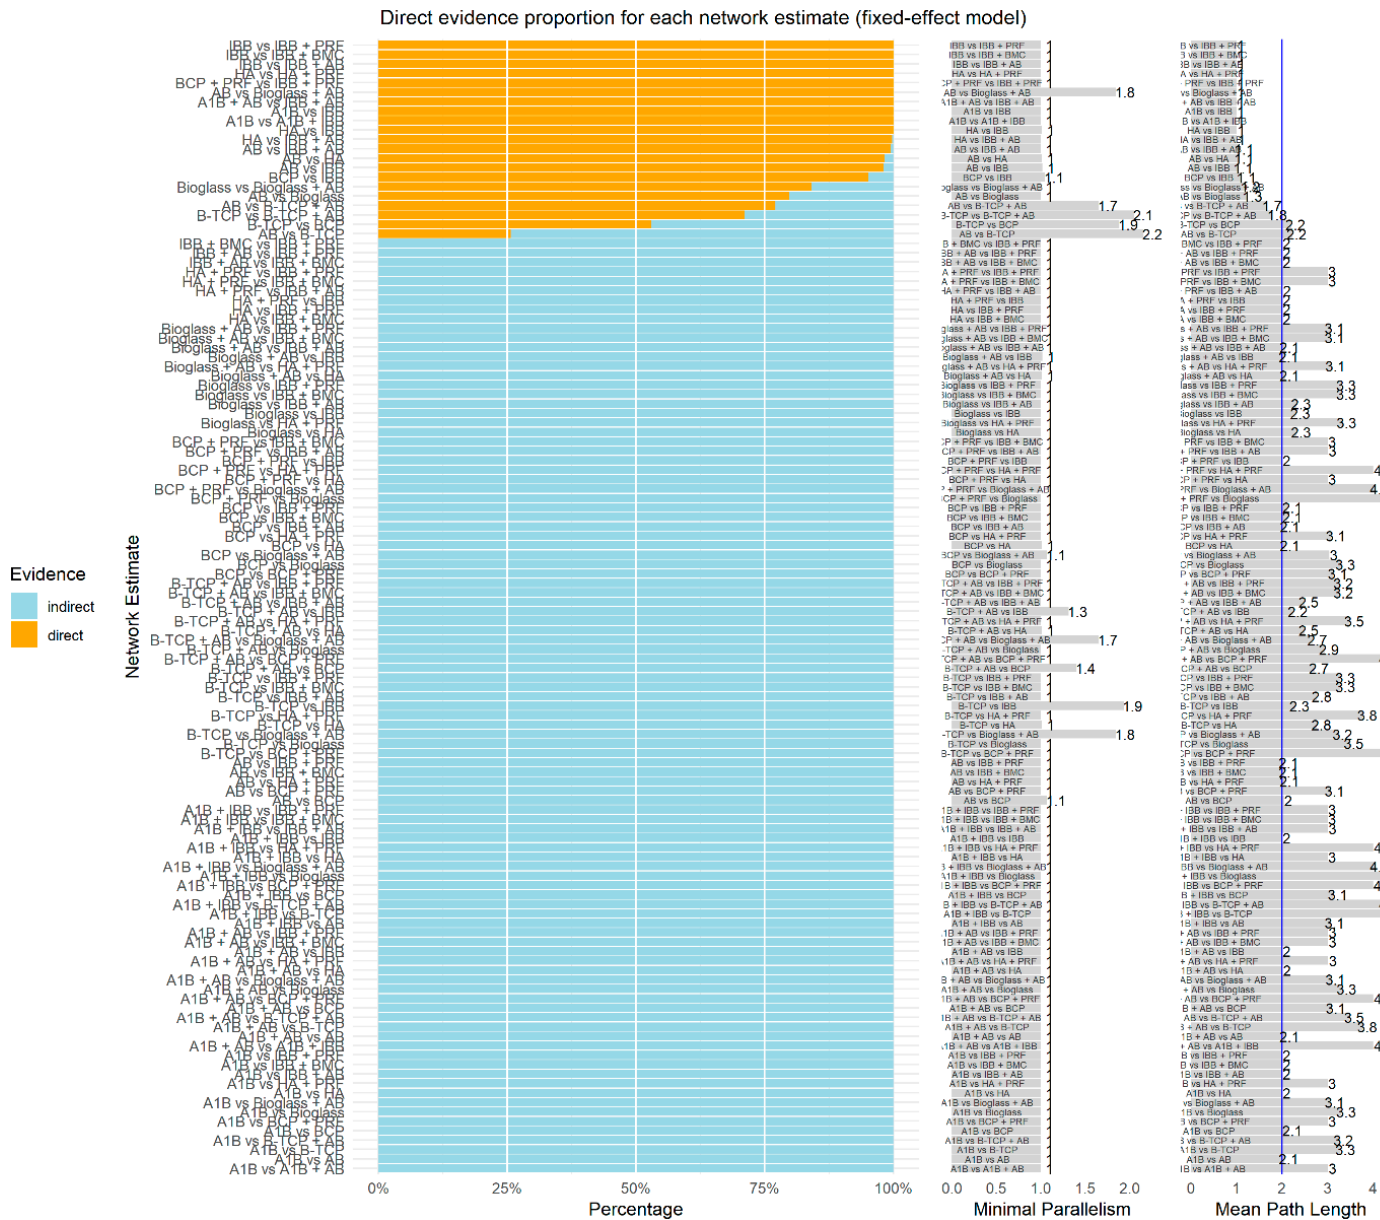

**Figure S1.** Direct and indirect evidence for NBRR.

**Table S1.** League table for NBRR.

|   | V1                             | V2                           | V3                             | V4                          | V5                             | V6                             | V7                           | V8                           | V9                      | V10                     | V11                        | V12 | V13                            | V14                        | V15 | V16                         |
|---|--------------------------------|------------------------------|--------------------------------|-----------------------------|--------------------------------|--------------------------------|------------------------------|------------------------------|-------------------------|-------------------------|----------------------------|-----|--------------------------------|----------------------------|-----|-----------------------------|
| 1 | A1B                            | .                            | -11.90 (-<br>20.18; -<br>3.62) | .                           | .                              | .                              | .                            | .                            | .                       | .                       | .                          | .   | -13.90 (-<br>24.70; -<br>3.10) | .                          | .   | .                           |
| 2 | -24.05 (-<br>44.36; -<br>3.73) | A1B + AB                     | .                              | .                           | .                              | .                              | .                            | .                            | .                       | .                       | .                          | .   | .                              | 6.50 (-<br>9.02;<br>22.02) | .   | .                           |
| 3 | -11.90 (-<br>20.18; -<br>3.62) | 12.15 (-<br>9.79;<br>34.08)  | A1B + IBB                      | .                           | .                              | .                              | .                            | .                            | .                       | .                       | .                          | .   | .                              | .                          | .   | .                           |
| 4 | -18.86 (-<br>31.55; -<br>6.18) | 5.18 (-<br>12.18;<br>22.54)  | -6.96 (-<br>22.11;<br>8.18)    | AB                          | -0.20 (-<br>13.75;<br>13.35)   | 12.56 (<br>3.89;<br>21.23)     | .                            | .                            | -6.70 (-19.30;<br>5.90) | -0.66 (-11.14;<br>9.81) | 5.90 (-<br>1.77;<br>13.57) | .   | 5.60 (-<br>2.01;<br>13.21)     | 1.40 (-<br>6.57; 9.37)     | .   | .                           |
| 5 | -12.63 (-<br>26.54;<br>1.29)   | 11.42 (-<br>7.28;<br>30.12)  | -0.73 (-<br>16.92;<br>15.46)   | 6.24 (-<br>2.01;<br>14.49)  | B-TCP                          | 3.39 (-<br>5.40;<br>12.19)     | -2.20 (-<br>13.04;<br>8.64)  | .                            | .                       | .                       | .                          | .   | .                              | .                          | .   | .                           |
| 6 | -8.15 (-<br>22.43;<br>6.14)    | 15.90 (-<br>2.86;<br>34.67)  | 3.75 (-<br>12.75;<br>20.26)    | 10.72 (<br>2.92;<br>18.52)  | 4.48 (-<br>3.30;<br>12.26)     | B-TCP +<br>AB                  | .                            | .                            | .                       | .                       | .                          | .   | .                              | .                          | .   | .                           |
| 7 | -14.51 (-<br>26.66; -<br>2.35) | 9.54 (-<br>8.40;<br>27.48)   | -2.61 (-<br>17.31;<br>12.10)   | 4.36 (-<br>3.60;<br>12.32)  | -1.88 (-<br>10.40;<br>6.65)    | -6.36 (-<br>16.09;<br>3.37)    | BCP                          | .                            | .                       | .                       | .                          | .   | 0.51 (-<br>5.43; 6.45)         | .                          | .   | .                           |
| 8 | -12.22 (-<br>27.22;<br>2.78)   | 11.82 (-<br>8.29;<br>31.93)  | -0.32 (-<br>17.45;<br>16.81)   | 6.64 (-<br>5.72;<br>19.00)  | 0.40 (-<br>13.21;<br>14.02)    | -4.08 (-<br>18.07;<br>9.91)    | 2.28 (-<br>9.53;<br>14.10)   | BCP +<br>PRF                 | .                       | .                       | .                          | .   | .                              | .                          | .   | -3.30 (-<br>11.59;<br>4.99) |
| 9 | -27.05 (-<br>44.14; -<br>9.96) | -3.00 (-<br>23.79;<br>17.79) | -15.15 (-<br>34.13;<br>3.84)   | -8.18 (-<br>19.63;<br>3.26) | -14.42 (-<br>28.53; -<br>0.31) | -18.90 (-<br>32.75; -<br>5.05) | -12.54 (-<br>26.48;<br>1.40) | -14.82 (-<br>31.67;<br>2.02) | Bioglass                | 8.80 (-3.19;<br>20.79)  | .                          | .   | .                              | .                          | .   | .                           |

|    |                        |                      |                       |                      |                      |                        |                      |                       |                      |                       |                      |                      |                       |                      |                       |                     |
|----|------------------------|----------------------|-----------------------|----------------------|----------------------|------------------------|----------------------|-----------------------|----------------------|-----------------------|----------------------|----------------------|-----------------------|----------------------|-----------------------|---------------------|
| 10 | -19.53 (-35.98; -3.08) | 4.52 (-15.76; 24.79) | -7.63 (-26.04; 10.79) | -0.66 (-11.14; 9.81) | -6.90 (-20.23; 6.43) | -11.38 (-24.44; 1.67)  | -5.02 (-18.18; 8.13) | -7.31 (-23.51; 8.89)  | 7.52 (-3.57; 18.61)  | Bioglass + AB         | .                    | .                    | .                     | .                    | .                     | .                   |
| 11 | -12.55 (-25.00; -0.11) | 11.49 (-5.78; 28.77) | -0.65 (-15.60; 14.29) | 6.31 (-0.80; 13.42)  | 0.07 (-9.73; 9.87)   | -4.41 (-14.41; 5.59)   | 1.95 (-6.11; 10.02)  | -0.33 (-12.44; 11.78) | 14.49 (1.02; 27.97)  | 6.97 (-5.68; 19.63)   | HA                   | -5.00 (-15.18; 5.18) | -1.29 (-7.58; 4.99)   | -4.50 (-12.37; 3.37) | .                     | .                   |
| 12 | -17.55 (-33.63; -1.48) | 6.49 (-13.56; 26.54) | -5.65 (-23.74; 12.43) | 1.31 (-11.11; 13.73) | -4.93 (-19.06; 9.20) | -9.41 (-23.68; 4.86)   | -3.05 (-16.04; 9.94) | -5.33 (-21.15; 10.49) | 9.49 (-7.39; 26.38)  | 1.97 (-14.27; 18.22)  | -5.00 (-15.18; 5.18) | HA + PRF             | .                     | .                    | .                     | .                   |
| 13 | -13.90 (-24.70; -3.10) | 10.15 (-7.06; 27.35) | -2.00 (-15.60; 11.60) | 4.96 (-1.70; 11.63)  | -1.27 (-10.05; 7.50) | -5.75 (-15.10; 3.59)   | 0.61 (-4.98; 6.19)   | -1.68 (-12.09; 8.74)  | 13.15 (-0.10; 26.39) | 5.63 (-6.78; 18.04)   | -1.35 (-7.53; 4.84)  | 3.65 (-8.26; 15.56)  | IBB                   | -4.20 (-12.02; 3.62) | -6.94 (-12.66; -1.22) | -1.62 (-7.92; 4.67) |
| 14 | -17.55 (-30.65; -4.44) | 6.50 (-9.02; 22.02)  | -5.65 (-21.15; 9.85)  | 1.32 (-6.46; 9.10)   | -4.92 (-15.35; 5.51) | -9.40 (-19.95; 1.15)   | -3.04 (-12.04; 5.96) | -5.32 (-18.11; 7.47)  | 9.50 (-4.34; 23.34)  | 1.98 (-11.06; 15.03)  | -4.99 (-12.58; 2.59) | 0.01 (-12.69; 12.70) | -3.65 (-11.07; 3.78)  | IBB + AB             | .                     | .                   |
| 15 | -20.84 (-33.06; -8.62) | 3.21 (-14.93; 21.34) | -8.94 (-23.70; 5.82)  | -1.98 (-10.76; 6.81) | -8.21 (-18.69; 2.26) | -12.70 (-23.66; -1.74) | -6.34 (-14.33; 1.66) | -8.62 (-20.50; 3.26)  | 6.21 (-8.22; 20.63)  | -1.31 (-14.98; 12.35) | -8.29 (-16.71; 0.14) | -3.29 (-16.50; 9.93) | -6.94 (-12.66; -1.22) | -3.29 (-12.67; 6.08) | IBB + BMC             | .                   |
| 16 | -15.52 (-28.02; -3.02) | 8.52 (-9.80; 26.84)  | -3.62 (-18.61; 11.37) | 3.34 (-5.83; 12.51)  | -2.90 (-13.70; 7.90) | -7.38 (-18.65; 3.89)   | -1.02 (-9.44; 7.40)  | -3.30 (-11.59; 4.99)  | 11.52 (-3.14; 26.19) | 4.01 (-9.91; 17.92)   | -2.97 (-11.79; 5.86) | 2.03 (-11.44; 15.50) | -1.62 (-7.92; 4.67)   | 2.02 (-7.71; 11.76)  | 5.32 (-3.19; 13.82)   | IBB + PRF           |



**Table S2.** P-score values ranging from highest (poor efficiency) to lowest (better efficiency) compared to AB.

| Intervention | P-score |
|--------------|---------|
| A1B          | 0.9788  |
| B-TCP+AB     | 0.8423  |
| HA           | 0.6782  |
| BCP+PRF      | 0.6588  |
| B-TCP        | 0.6489  |
| A1B+IBB      | 0.6420  |
| IBB          | 0.6016  |
| BCP          | 0.5529  |
| IBB+PRF      | 0.4872  |
| HA+PRF       | 0.3999  |
| IBB+AB       | 0.3824  |
| Bioglass+AB  | 0.3224  |
| AB           | 0.3030  |
| IBB+BMC      | 0.2150  |
| A1B+AB       | 0.2028  |
| Bioglass     | 0.0839  |

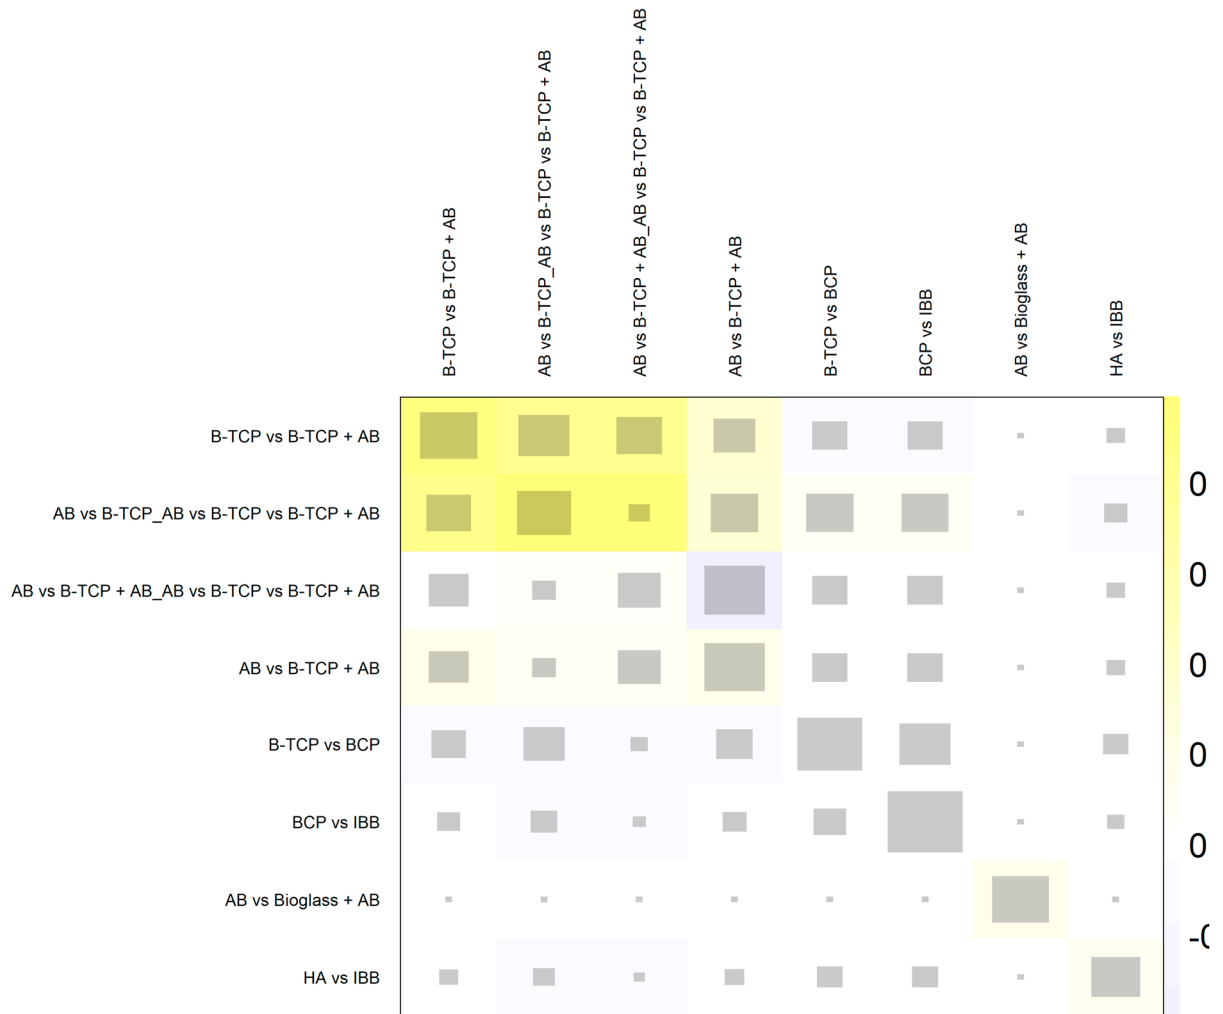

**Figure S2.** Heat plot for NBRR.
